# Supplementary material
Source: PubMed Central journal article supplement (PMC6681914)
Supplement: NIHMS1039363-supplement-Supp_Fig_2.pdf [file NIHMS1039363-supplement-Supp_Fig_2.pdf]

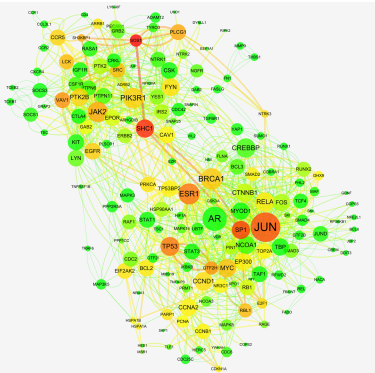

**Supplemental Fig 2. Protein-Protein Interaction network of hub genes.**

Hub genes ranked by betweenness and degree with respect to protein-protein interactions were exported to Cytoscape and the network statistics of each module were calculated. Either "Group Attribute layout" or "Attribute Circle layout" was applied for network visualization, as appropriate. The node size corresponds to the degree of each gene in the network, and the edge size corresponds to the edge betweenness of each gene. The node color corresponds to the betweenness and centrality, and the edge color corresponds to edge betweenness. Red represents higher values for nodes and edges. Green represents lower values for nodes and edges.
