# Supplementary material
Source: PubMed Central journal article supplement (PMC6681914)
Supplement: NIHMS1039363-supplement-Supp_Fig_3.pdf [file NIHMS1039363-supplement-Supp_Fig_3.pdf]

|         |      |      |
|---------|------|------|
| 2012002 |      |      |
| 2012004 |      |      |
| 2012006 |      |      |
| 2012007 |      |      |
| 2012008 |      |      |
| 2012009 |      |      |
| 2012010 |      |      |
| 2012011 | Blue |      |
| 2012012 | Blue |      |
| 2012013 |      |      |
| 2012014 |      |      |
| 2012015 |      |      |
| 2012016 |      |      |
| 2012017 | Blue | Blue |
| 2012018 |      |      |
| 2012019 |      |      |
| 2012020 |      | Blue |
| 2012021 |      |      |
| 2012022 | Blue | Blue |
| 2012023 |      |      |
| 2012024 |      | Blue |
|         | JEV  | WNV  |

**Supplemental Fig 3. Baseline flavivirus serostatus of the participants.** Serum samples taken at baseline (prior to immunization) were analyzed for anti-WNV and anti-JEV antibodies by immunofluorescence staining. Blue, individuals scored as seropositive; white, individuals scored as seronegative.
