# Supplementary material
Source: PubMed Central journal article supplement (PMC6681914)
Supplement: NIHMS1039363-supplement-Supp_Fig_4.pdf [file NIHMS1039363-supplement-Supp_Fig_4.pdf]

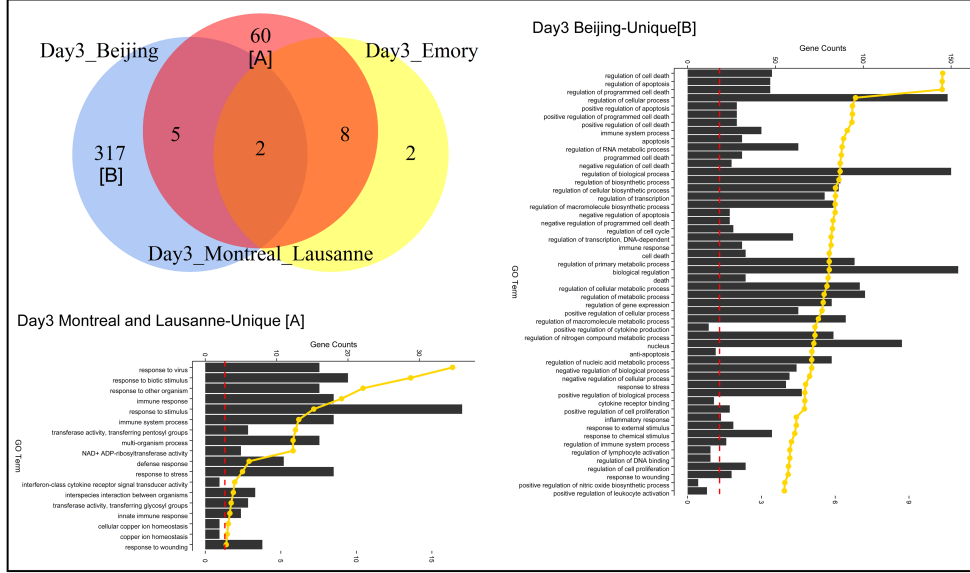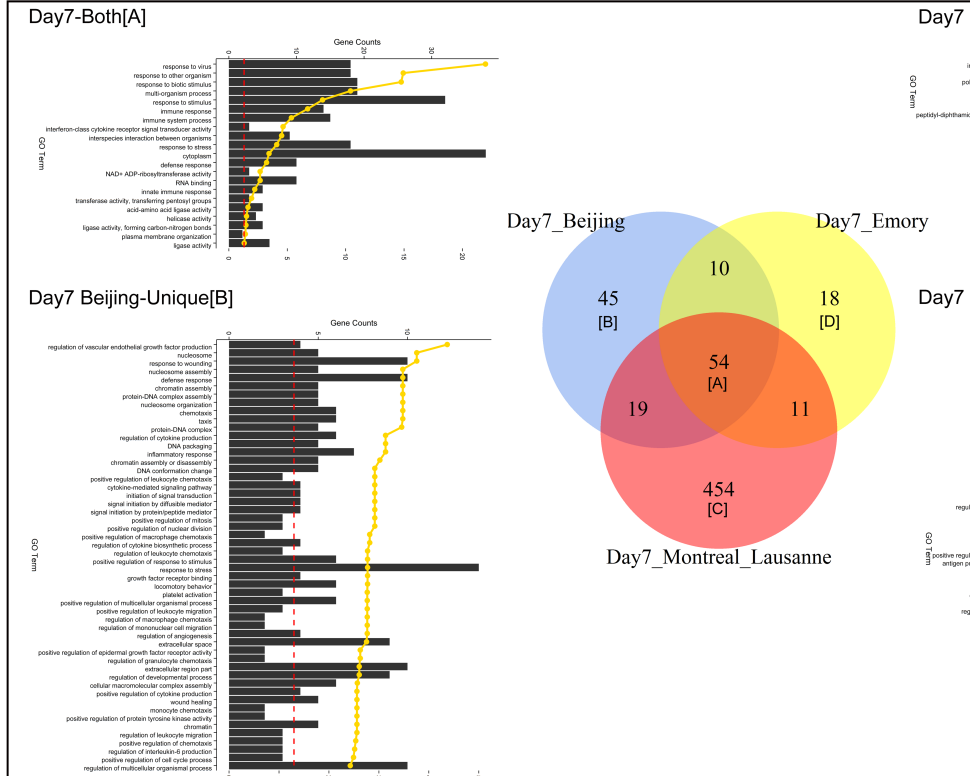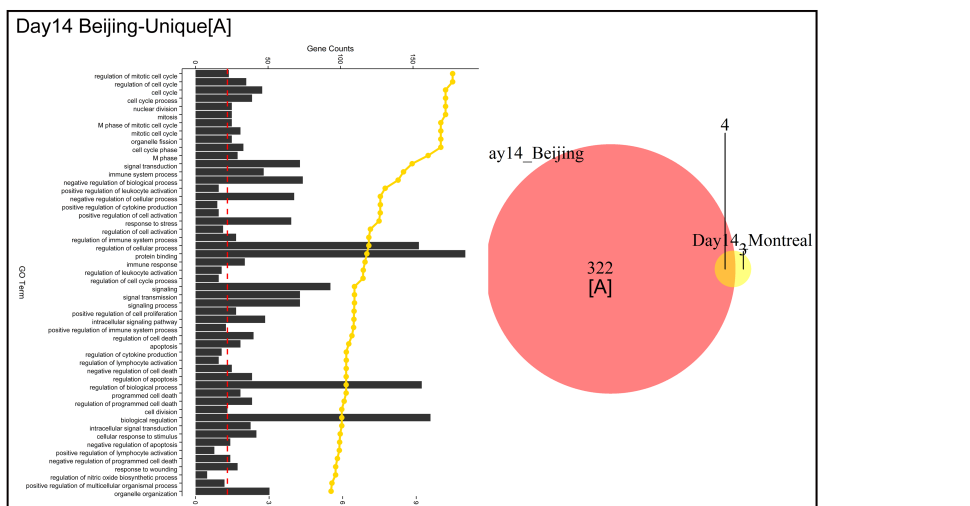

**Supplemental Fig 4. Gene ontology overlap comparison of three cohorts at each time point.**

The Venn diagrams show the overlap of the DEGs at the indicated time points of three cohorts. The upper, middle, and lower panels correspond to the Day 3, 7, and 14 time points, respectively. The numbers displayed in the Venn diagrams represent the numbers of DEGs that are unique to a given cohort or shared by multiple cohorts. The bar plots indicate the number of genes in different gene ontology categories within lists of genes that are either unique to a given cohort or shared by multiple cohorts. The letter in brackets ([x]) denotes the corresponding portion of the Venn diagram from which the gene list was obtained. Biological Processes (BP), Molecular Function (MF), and Cellular Components (CC) terms were used. To include only significant results, the FDR threshold was set to 0.05. The top 50 terms were selected and are shown in the charts. The adjusted p values are represented by the  $-\log_{10}$  (adjusted p value) values, shown as yellow dots.
